# Supplementary material for: The Not5 Subunit of the Ccr4-Not Complex Connects Transcription and Translation
Source: PubMed Central journal article supplement (PMC4207488; doi:10.1371/journal.pgen.1004569), 2014-10-23

### A Y2H Rpb4 interactions (Rpb4 bait)

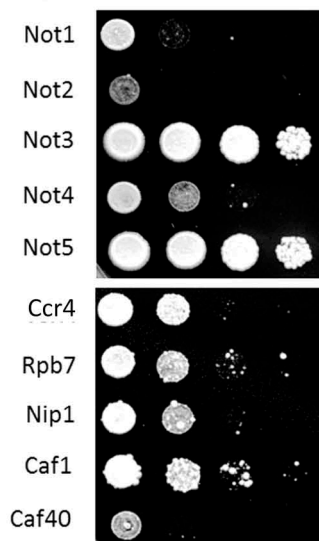

### D Y2H Nip1 interactions (Nip1 bait)

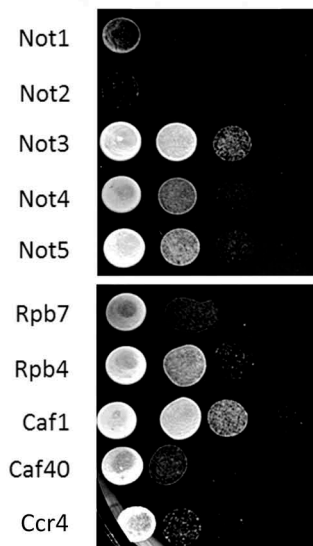

### B

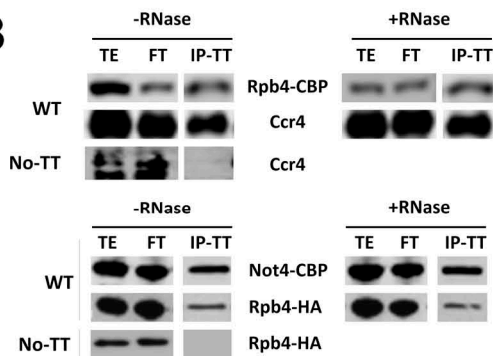

### C

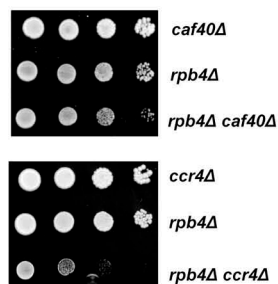

### E

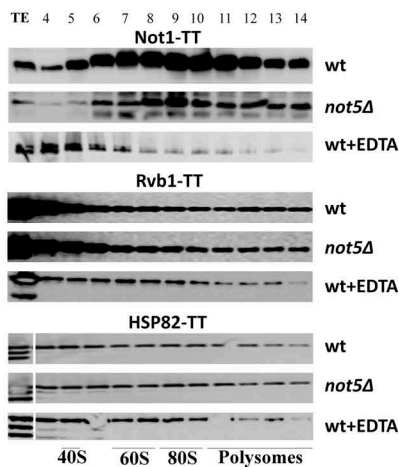

Supplement: pgen.1004569.s001.pdf [file pgen.1004569.s001.pdf]
