# Supplementary material for: The Not5 Subunit of the Ccr4-Not Complex Connects Transcription and Translation
Source: PubMed Central journal article supplement (PMC4207488; doi:10.1371/journal.pgen.1004569), 2014-10-23

Merge

$\alpha$ -Myc  
*not5 $\Delta$*  + Myc-Not5

DAPI

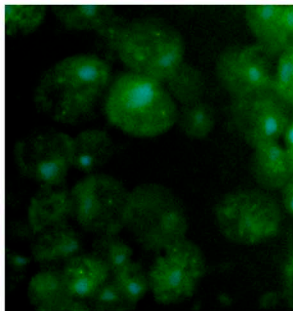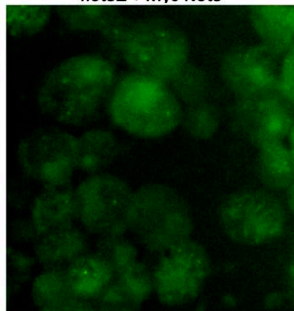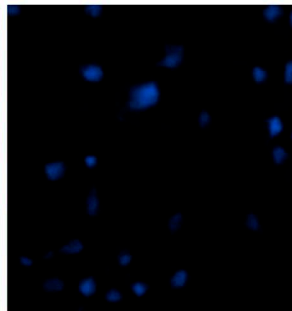

*not5 $\Delta$*  + Myc-Not5-NES

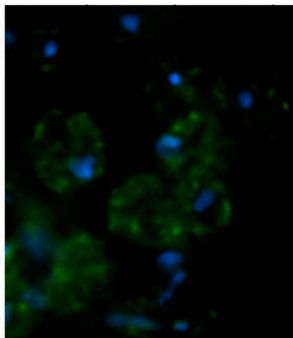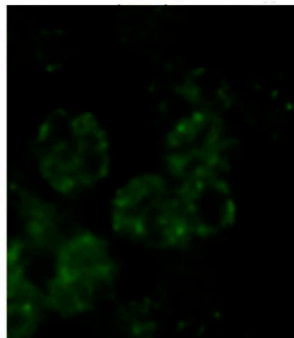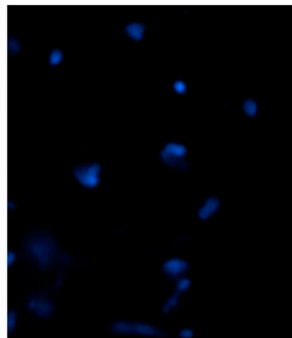

Supplement: pgen.1004569.s002.pdf [file pgen.1004569.s002.pdf]
