# Supplementary material for: The Not5 Subunit of the Ccr4-Not Complex Connects Transcription and Translation
Source: PubMed Central journal article supplement (PMC4207488; doi:10.1371/journal.pgen.1004569), 2014-10-23

Nip1 mRNA

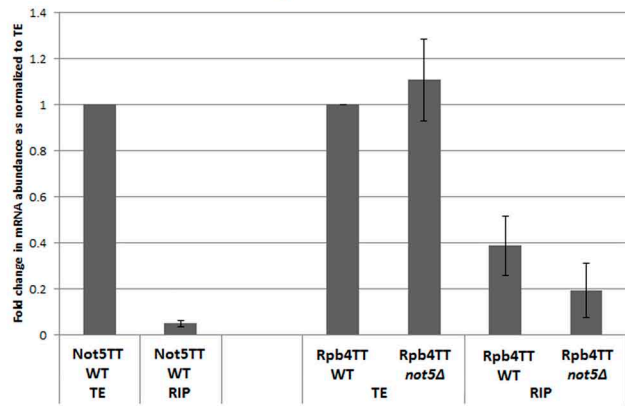

Rpb1 mRNA

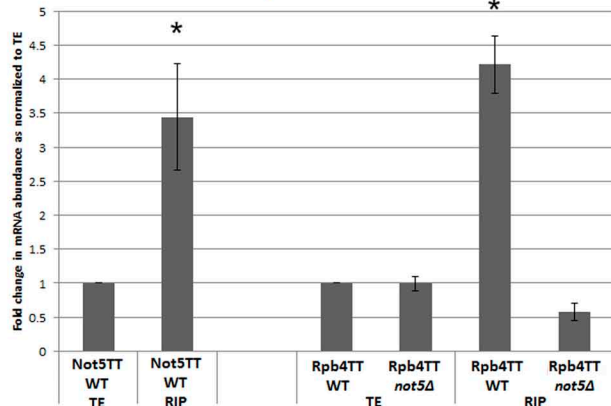

Nip1 mRNA

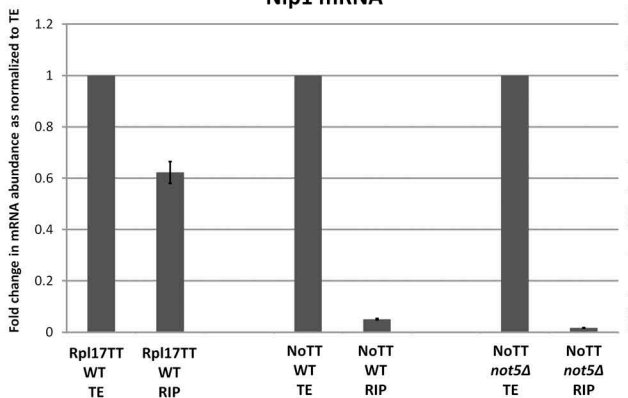

Rpb1 mRNA

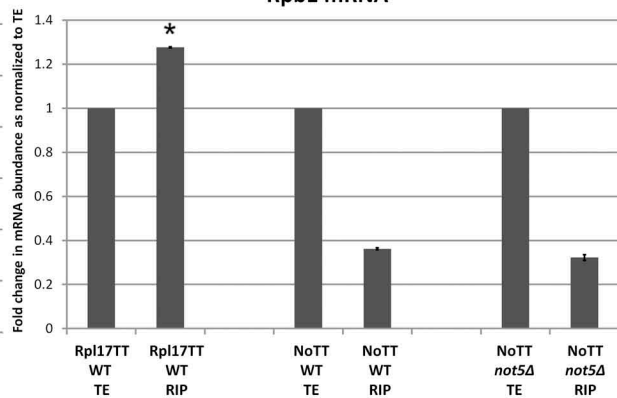

Supplement: pgen.1004569.s004.pdf [file pgen.1004569.s004.pdf]
