# Supplementary material for: The Not5 Subunit of the Ccr4-Not Complex Connects Transcription and Translation
Source: PubMed Central journal article supplement (PMC4207488; doi:10.1371/journal.pgen.1004569), 2014-10-23

-Leu, +Gal

Rpb4 plex

Not3

Not5

Rpb7

Nip1

Rpb7 plex

Not3

Not5

Rpb4

Nip1

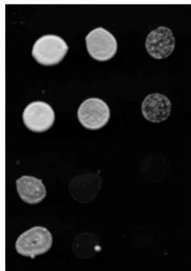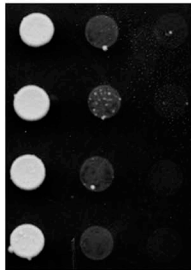

Supplement: pgen.1004569.s005.pdf [file pgen.1004569.s005.pdf]
