# Supplementary material for: The Not5 Subunit of the Ccr4-Not Complex Connects Transcription and Translation
Source: PubMed Central journal article supplement (PMC4207488; doi:10.1371/journal.pgen.1004569), 2014-10-23

Purifs (Anti CBP)

| Rpb2-CBP |              | Rpb3-CBP |              | Rpb11-CBP |              |
|----------|--------------|----------|--------------|-----------|--------------|
| WT       | <i>not5Δ</i> | WT       | <i>not5Δ</i> | WT        | <i>not5Δ</i> |

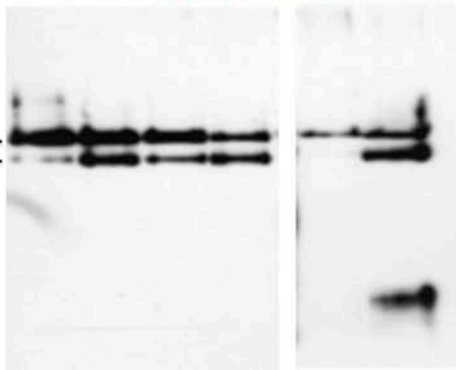

Purifs (Anti Rpb1)

| Rpb2-CBP |              | Rpb3-CBP |              | Rpb11-CBP |              |
|----------|--------------|----------|--------------|-----------|--------------|
| WT       | <i>not5Δ</i> | WT       | <i>not5Δ</i> | WT        | <i>not5Δ</i> |

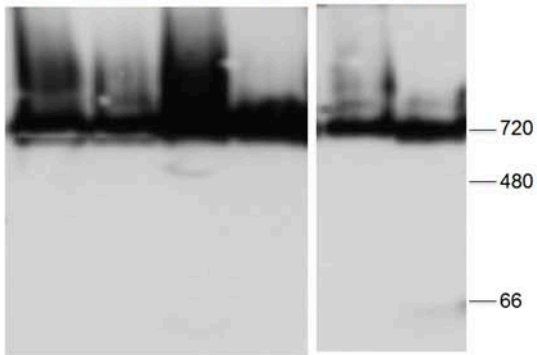

Supplement: pgen.1004569.s006.pdf [file pgen.1004569.s006.pdf]
