# Supplementary material for: The Not5 Subunit of the Ccr4-Not Complex Connects Transcription and Translation
Source: PubMed Central journal article supplement (PMC4207488; doi:10.1371/journal.pgen.1004569), 2014-10-23

IP-Rpb2  
(after chase)

0 60 120 min (chase)

WT

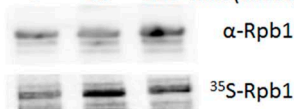

$^{35}\text{S}/\alpha\text{-Rpb1}$   
signal ratios  
in WT IP

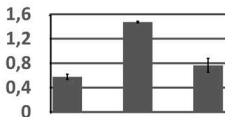

$\Delta not5$

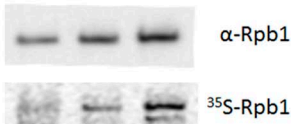

$^{35}\text{S}/\alpha\text{-Rpb1}$   
signal ratios  
in  $\Delta not5$  IP

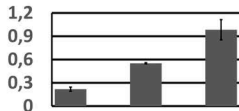

Supplement: pgen.1004569.s007.pdf [file pgen.1004569.s007.pdf]
